# Supplementary material
Source: ML conference proceedings conference paper supplement (https://aclanthology.org/P11-1063)
Supplement: Datasets [file P11-1063.Datasets.tar.bz2]

# Documentation, Code & Data for *Incremental Syntactic Language Models for Phrase-based Translation*

Lane Schwartz

Air Force Research Laboratory  
Wright-Patterson AFB, OH USA  
lane.schwartz@wpafb.af.mil

William Schuler

Ohio State University  
Columbus, OH USA  
schuler@ling.ohio-state.edu

## Abstract

Incremental syntactic language models score sentences in left-to-right fashion and are therefore a good mechanism for incorporating syntax into phrase-based translation. We integrate an incremental syntactic LM, ModelBlocks, into the Moses phrase-based translation system. We document the novel contributions to software which accompany the paper *Incremental Syntactic Language Models for Phrase-based Translation* (Schwartz et al., 2011). The exact models used in these experiments are also released.

## 1 Contribution Summary

The exact versions of the ModelBlocks HHMM parser and the Moses phrase-based machine translation systems used in *Incremental Syntactic Language Models for Phrase-based Translation* are located in the **software** directory. The specific modifications and additions we made to ModelBlocks and Moses have been copied into the **software/diffs** directory.

The exact versions of the ModelBlocks parsing model and Moses phrase table and  $n$ -gram language model files used are located in the **data-models** directory.

This document summarizes our code and data contributions, and illustrates how to compile and run our code, for the purposes of replicating and building on our work.

## 2 External Dependencies

The following external code and external data sets, distributed separately, are required to repli-

Chris Callison-Burch

Johns Hopkins University  
Baltimore, MD USA  
ccb@cs.jhu.edu

Stephen Wu

Mayo Clinic  
Rochester, MN USA  
wu.stephen@mayo.edu

To compile Moses:

```
$ cd software/moses-decoder
$ ./regenerate-makefiles.sh
$ ./configure --with-synlm=../modelblocks
$ make
```

To translate:

```
$ cat /path/to/devtest.ur | \
  moses-cmd/src/moses \
  --config ../../data-models/moses.ini
```

Figure 1: To compile and run Moses with our modifications, run the above commands.

cate our results:

- SRI Language Modeling Toolkit (Stolcke, 2002)
- Penn Wall Street Journal Treebank (Marcus et al., 1993)
- NIST Open MT Urdu-English data, as partitioned and preprocessed in (Baker et al., 2009)

## 3 Code: Moses

The code for the Moses decoder is available at <http://www.sf.net/projects/mosesdecoder>. The results in this submission were based on **svn** trunk revision 3739, with additions and modifications as listed below.

### 3.1 Code Additions

We implemented a syntactic language model within Moses:

**moses-decoder/moses/src**  
**SyntacticLanguageModel.h**  
**SyntacticLanguageModel.cpp**  
**SyntacticLanguageModelFiles.h**  
**SyntacticLanguageModelState.h**

### 3.2 Code Modifications

We modified existing Moses source code to compile and integrate the new syntactic language model feature:

**moses-decoder/**  
**config.h.in**  
**configure.in**  
**regenerate-makefiles.sh**  
**moses/src/**  
**Hypothesis.cpp**  
**Makefile.am**  
**Parameter.cpp**  
**ScoreIndexManager.cpp**  
**StaticData.h**  
**StaticData.cpp**

## 4 Code: ModelBlocks

The code for the parser is available at <http://www.sf.net/projects/modelblocks>. The results in this submission were based on git master tree revision 839b44d2d7e7c2d0845401b4c77f3070a665bde7, with additions and modifications as listed below.

### 4.1 Code Additions

We implemented the following scripts to calculate language models and to interpolate language models for perplexity calculations:

**wsjparse/scripts/**  
**calc-ngram-counts.sh**  
**calc-ngram-lm-ppl.sh**  
**calc-ngram-lm.sh**  
**elim-rare-words-from-sents.py**  
**interpolate-lm.rb**  
**interpolate-ngram-lms.rb**

### 4.2 Code Modifications

**rvtl/include/nl-hmm.h** Modified HMM implementation to calculate beam probability sum, and to appropriately handle unknown words.

**wsjparse/Makefile** Modified to appropriately handle unknown words.

**wsjparse/include/HHMMParser.h**  
Enhanced parser to calculate and output perplexity values.

**wsjparse/include/TextObsModel.h**  
Modified parser lexical model to appropriately handle unknown words

## 5 Data: Models

The exact data models used during parsing and translation are provided below:

**wsjTRAIN-pu-unk-nr.gf-hhmm.model**  
Parser model, trained on WSJ Treebank

**order-5.srlm** 5-gram language model, trained on WSJ Treebank

**phrase-table.gz** Moses Urdu-English translation phrase table

**reordering-table.wbe-msd-bidirectional-fe.gz**  
Moses reordering table

**moses.ini** Urdu-English Moses configuration, tuned using the above models

## 6 How to Reproduce Results

Figure 1 lists the steps required to reproduce our translation results (for Moses configured using the syntactic language model) on the NIST Open MT 2008 devtest set.

Figure 2 lists the steps required to use the HHMM parser to parse and calculate perplexity values.

The code additions in 4.1 can be used to calculate perplexity data using SRILM (**calc-ngram-lm-ppl.sh**), to interpolate HHMM and  $n$ -gram language models (**interpolate-ngram-lms.rb**), and to interpolate two different  $n$ -gram language models (**interpolate-lm.rb**).

```
To compile parser:
$ cd software/wsjparse
$ echo "USER_TREEBANK_LOCATION = /path/to/WSJ_Treebank" > user-treebank-location.txt
$ make bin/parser-gf-hhmm

To rebuild the parser model:
$ mkdir genmodel
$ make genmodel/wsJTRAIN-pu-unk-nr.gf-hhmm.model

To parse and calculate perplexity:
$ cat /path/to/devtest.en | bin/parser-gf-hhmm --beam=2000 --perplexity \
  data-models/wsJTRAIN-pu-unk-nr.gf-hhmm.model > devtest.ur.hhmm.ppl
```

Figure 2: To compile the parser with our modifications, run the above commands.

## References

- Kathy Baker, Steven Bethard, Michael Bloodgood, Ralf Brown, Chris Callison-Burch, Glen Copper-smith, Bonnie Dorr, Wes Filardo, Kendall Giles, Anni Irvine, Mike Kayser, Lori Levin, Justin Martineau, Jim Mayfield, Scott Miller, Aaron Phillips, Andrew Philpot, Christine Piatko, Lane Schwartz, and David Zajic. 2009. Semantically informed machine translation (SIMT). SCALE summer workshop final report, Human Language Technology Center Of Excellence.
- Mitchell P. Marcus, Beatrice Santorini, and Mary Ann Marcinkiewicz. 1993. Building a large annotated corpus of English: the Penn Treebank. *Computational Linguistics*, 19(2):313–330.
- Lane Schwartz, Chris Callison-Burch, William Schuler, and Stephen Wu. 2011. Incremental syntactic language models for phrase-based translation. In *Proceedings of the 49th Annual Meeting of the Association for Computational Linguistics: Human Language Technologies*.
- Andreas Stolcke. 2002. SRILM - an extensible language modeling toolkit. In *Proceedings of the International Conference on Spoken Language Processing*, September.
