# Supplementary material
Source: ML conference proceedings conference paper supplement (https://aclanthology.org/P11-1063)
Supplement: Software [file Quick-Start-Guide.doc]

**Quick Start Guide**

This guide has 14 steps to install Moses Toolkit and translate a document with the default values on a new computer. Refer to Help-Tutorial.doc for detailed instructions including how to change the defaults.

**Install Moses Toolkit**

1. Copy the *moses-for-mere-mortals* directory to your home directory.
2. Change to the *moses-for-mere-mortals* scripts directory:
   ~$ cd $HOME/moses-for-mere-mortals/scripts [Enter]
3. Build (create) the Moses Toolkit programs:
   ~/moses-for-mere-mortals/scripts$ ./create-1.35 [Enter]

**Train translation model**

1. Prepare the training corpus:
   ~/moses-for-mere-mortals/scripts$ ./make-test-files-0.14 [Enter]
2. Train the translation model:
   ~/moses-for-mere-mortals/scripts$ ./train-1.11 [Enter]
3. Wait for training to finish. (Over 7 hours on Intel i7 720-QM processor with 8 GB RAM)

**Translate a document**

1. Find the filename of the new log (the exact name will be different from that below):
   ~/moses-for-mere-mortals/scripts$ ls ~/moses-irstlm-randlm/logs [Enter]
   pt-en.C-200000.for_train-1.LM-300000.MM-1.day-23-02-10-time-09-24-37.txt
2. Use an editor such as gedit to add the log's filename to the line starting with “logfile=”:
   ~/moses-for-mere-mortals/scripts$ gedit ./translate-1.32 [Enter]
   logfile=pt-en.C-200000.for_train-1.LM-300000.MM-1.day-23-02-10-time-09-24-37.txt
3. Save the change and exit the editor.
4. Translate a document:
   ~/moses-for-mere-mortals/scripts$ ./translate-1.32 [Enter]
5. Review the translation output:
   ~/moses-for-mere-mortals/scripts$ gedit \
   ~/moses-irstlm-randlm/translation_output/100.en.pt.moses [Enter]
6. Evaluate the translation:
   ~/moses-for-mere-mortals/scripts$ ./score-0.85 [Enter]
7. Get the name of the score report file (the exact name will be different from that below):
   ~/moses-for-mere-mortals/scripts$ ls ~/moses-irstlm-randlm/translation_scoring [Enter]
   100-BLEU-0.6063-NIST-8.1554-12-07-2010-pt-en.F-0-R-1-T-1.L-1.whole-doc
8. Review the evaluation output:
   ~/moses-for-mere-mortals/scripts$ gedit \
   ~/moses-irstlm-randlm/translation_scoring/100-BLEU-0.6063-NIST-8.1554-12-07-2010-pt-en.F-0-R-1-T-1.L-1.whole-doc [Enter]

// Special thanks to **Tom Hoar** for consolidating the previous documentation into this Quick-Start-Guide.doc to help users to get up to speed very quickly. //
